# Supplementary material for: What do patients expect? Assessing patient-centredness from the patients’ perspective: an interview study
Source: HighWire-hosted journal article supplement (doi:10.1136/bmjopen-2020-047810), 2021-07-01
Supplement: bmjopen-2020-047810supp001_data_supplement.pdf [file bmjopen-2020-047810supp001_data_supplement.pdf]

## 1 Consolidated criteria for reporting qualitative studies (COREQ): 32-item checklist

2 Table A: Consolidated criteria for reporting qualitative studies (COREQ): 32-item checklist <sup>1</sup>

| Domain 1: Research team and reflexivity |                                          |                                                                                                                                                          |                                                                             |
|-----------------------------------------|------------------------------------------|----------------------------------------------------------------------------------------------------------------------------------------------------------|-----------------------------------------------------------------------------|
| Personal Characteristics                |                                          |                                                                                                                                                          |                                                                             |
| 1.                                      | Interviewer/facilitator                  | Which author/s conducted the interview or focus group?                                                                                                   | See page 4                                                                  |
| 2.                                      | Credentials                              | What were the researcher's credentials? E.g. PhD, MD                                                                                                     | M.Sc. in Psychology, doctoral researcher                                    |
| 3.                                      | Occupation                               | What was their occupation at the time of the study?                                                                                                      | Research Associate/Psychologist                                             |
| 4.                                      | Gender                                   | Was the researcher male or female?                                                                                                                       | See page 4                                                                  |
| 5.                                      | Experience and training                  | What experience or training did the researcher have?                                                                                                     | See page 4 f.                                                               |
| Relationship with participants          |                                          |                                                                                                                                                          |                                                                             |
| 6.                                      | Relationship established                 | Was a relationship established prior to study commencement?                                                                                              | A relationship for research purposes was established prior to the interview |
| 7.                                      | Participant knowledge of the interviewer | What did the participants know about the researcher? e.g. personal goals, reasons for doing the research                                                 | All reasons were disclaimed (doctoral and project related interests)        |
| 8.                                      | Interviewer characteristics              | What characteristics were reported about the interviewer/facilitator? e.g. Bias, assumptions, reasons and interests in the research topic                | See page 5                                                                  |
| Domain 2: study design                  |                                          |                                                                                                                                                          |                                                                             |
| Theoretical framework                   |                                          |                                                                                                                                                          |                                                                             |
| 9.                                      | Methodological orientation and Theory    | What methodological orientation was stated to underpin the study? e.g. grounded theory, discourse analysis, ethnography, phenomenology, content analysis | See page 5                                                                  |
| Participant selection                   |                                          |                                                                                                                                                          |                                                                             |
| 10.                                     | Sampling                                 | How were participants selected? e.g. purposive, convenience, consecutive, snowball                                                                       | See page 4                                                                  |
| 11.                                     | Method of approach                       | How were participants approached? e.g. face-to-face, telephone, mail, email                                                                              | See page 4                                                                  |
| 12.                                     | Sample size                              | How many participants were in the study?                                                                                                                 | See page 4                                                                  |
| 13.                                     | Non-participation                        | How many people refused to participate or dropped out? Reasons?                                                                                          | See page 4, reasons for non-participation were not disclosed to SZ          |

| Setting                         |                                |                                                                                                                                 |                                                                                    |
|---------------------------------|--------------------------------|---------------------------------------------------------------------------------------------------------------------------------|------------------------------------------------------------------------------------|
| 14.                             | Setting of data collection     | Where was the data collected? e.g. home, clinic, workplace                                                                      | See page 4                                                                         |
| 15.                             | Presence of non-participants   | Was anyone else present besides the participants and researchers?                                                               | Besides the interviewer and the participant, there were no other people present    |
| 16.                             | Description of sample          | What are the important characteristics of the sample? e.g. demographic data, date                                               | See page 7                                                                         |
| Data collection                 |                                |                                                                                                                                 |                                                                                    |
| 17.                             | Interview guide                | Were questions, prompts, guides provided by the authors? Was it pilot tested?                                                   | See page 5 and interview guide A2                                                  |
| 18.                             | Repeat interviews              | Were repeat interviews carried out? If yes, how many?                                                                           | Interviews were not repeated                                                       |
| 19.                             | Audio/visual recording         | Did the research use audio or visual recording to collect the data?                                                             | See page 5                                                                         |
| 20.                             | Field note                     | Were field notes made during and/or after the interview or focus group?                                                         | See page 5                                                                         |
| 21.                             | Duration                       | What was the duration of the interviews or focus group?                                                                         | See page 8                                                                         |
| 22.                             | Data saturation                | Was data saturation discussed?                                                                                                  | See page 5                                                                         |
| 23.                             | Transcripts returned           | Were transcripts returned to participants for comment and/or correction?                                                        | See page 5                                                                         |
| Domain 3: analysis and findings |                                |                                                                                                                                 |                                                                                    |
| Data analysis                   |                                |                                                                                                                                 |                                                                                    |
| 24.                             | Number of data coders          | How many data coders coded the data?                                                                                            | See page 5                                                                         |
| 25.                             | Description of the coding tree | Did authors provide a description of the coding tree?                                                                           | See page 5                                                                         |
| 26.                             | Derivation of theme            | Were themes identified in advance or derived from the data?                                                                     | See page 5                                                                         |
| 27.                             | Software                       | What software, if applicable, was used to manage the data?                                                                      | See page 5                                                                         |
| 28.                             | Participant checking           | Did participants provide feedback on the finding?                                                                               | Participants did not provide feedback on the findings                              |
| Reporting                       |                                |                                                                                                                                 |                                                                                    |
| 29.                             | Quotations presented           | Were participant quotations presented to illustrate the themes/findings? Was each quotation identified? e.g. participant number | Each quote was identified with interview number (no further data due to anonymity) |
| 30.                             | Data and findings consistent   | Is there consistency between the data presented and the findings?                                                               | See pages 8 to 11                                                                  |

|     |                         |                                                                        |                  |
|-----|-------------------------|------------------------------------------------------------------------|------------------|
| 31. | Clarity of major themes | Were major themes clearly presented in the findings?                   | See page 8 to 9  |
| 32. | Clarity of minor themes | Is there a description of diverse cases or discussion of minor themes? | See page 9 to 11 |

3

4 **REFERENCES**

- 5 1. Tong A, Sainsbury P, Craig J. Consolidated criteria for reporting qualitative research (COREQ): a  
6 32-item checklist for interviews and focus groups. *Int J Qual Heal Care*. 2007;19(6):349-357.

7
